# Supplementary material for: svist4get: a simple visualization tool for genomic tracks from sequencing experiments
Source: PubMed Central journal article supplement (PMC6404320; doi:10.1186/s12859-019-2706-8), 2019-03-06
Supplement: 12859_2019_2706_MOESM2_ESM.pdf [file 12859_2019_2706_MOESM2_ESM.pdf]

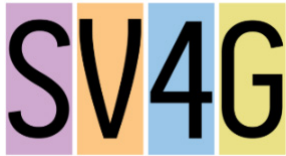

# Svist4get installation instructions and command-line examples

|                                                                                                                                   |   |
|-----------------------------------------------------------------------------------------------------------------------------------|---|
| Section 1. Installation.....                                                                                                      | 1 |
| Post-installation step.....                                                                                                       | 2 |
| Section 2. Console commands to reproduce the manuscript figures.....                                                              | 2 |
| Transcript-centric visualization (Figure 1 of the paper) .....                                                                    | 2 |
| Visualization anchored at the translation initiation site (Figure 2 of the paper) .....                                           | 2 |
| Section 3. Additional examples .....                                                                                              | 3 |
| Gene-centric selection of a genomic window.....                                                                                   | 3 |
| An arbitrary genomic window.....                                                                                                  | 3 |
| Section 4. Advanced visualization of tissue-specific expression for overlapping transcripts in mouse (Figure 3 of the paper)..... | 4 |
| Section 5. Advanced features and customization (Figure 4 of the paper).....                                                       | 4 |
| Useful customization options .....                                                                                                | 5 |

## Section 1. Installation

Svist4get is tested to work under Python 3.6 in Linux environment.

The stable release of svist4get can be installed directly from pypi:

```
python3 -m pip install svist4get
```

The development version is available at bitbucket:

```
git clone https://artegorov@bitbucket.org/artegorov/svist4get.git
cd svist4get
python3 -m pip install wheel
python3 setup.py sdist bdist_wheel
python3 -m pip install -e .
```

**Note:** the pdf files generated by svist4get can be imported and manually tweaked in vector graphics editing software such as Inkscape ([inkscape.org](https://inkscape.org)), given the necessary fonts are installed in the user OS. Default fonts losevka (<https://github.com/be5invis/losevka>) and Lato (available at <http://www.latofonts.com/lato-free-fonts/>) are provided with svist4get.

## Post-installation step

Svist4get comes with sample data that can be used to test visualization settings or reproduce example images.

The following command:

```
svist4get -sampledata
```

will unpack the sample data (\*.gtf, \*.fa, \*.bedGraph) and editable example configuration files (\*.cfg main configuration, palette.txt color palette) to the current working directory (see the newly created `svist4get_data` subfolder).

## Section 2. Console commands to reproduce the manuscript figures

Figure 1 and Figure 2 of the `svist4get` paper can be easily reproduced by running particular commands in the console (assuming the package installation and the post-installation preparatory step are finished).

### Transcript-centric visualization (Figure 1 of the paper)

#### Command line

```
svist4get -bg svist4get_data/RiboProElong_cut.bedGraph svist4get_data/RiboCov_cut.bedGraph  
svist4get_data/mRNACov_cut.bedGraph -t YFL031W -gtf svist4get_data/S.cerevisiae.gtf -fa  
svist4get_data/S.cerevisiae.dna.fa -it 'Gene HAC1' -bl 'A-Site Ribo-Seq' 'Coverage Ribo-Seq'  
'RNA-Seq' -hi -hrf 1 -c A4_p1
```

### Visualization anchored at the translation initiation site (Figure 2 of the paper)

#### Command line

```
svist4get -bg svist4get_data/RiboProElong_cut.bedGraph svist4get_data/RiboCov_cut.bedGraph  
svist4get_data/mRNACov_cut.bedGraph -gtf svist4get_data/S.cerevisiae.gtf -fa  
svist4get_data/S.cerevisiae.dna.fa -t YOR030W -w tis 100 30 -it 'Upstream ORF of DFG16 gene' -bl  
'A-Site Ribo-Seq' 'Coverage Ribo-Seq' 'RNA-Seq' -gi 386730-386772 -gi 386824-386999 -gil  
'Upstream ORF' 'CDS' -hf 386730 386772 ' ' -c A4_p2
```

## Section 3. Additional examples

### Gene-centric selection of a genomic window

The visualization shows intronic segment and another transcript in the selected window. An additional box highlight is used to specifically mark the intronic segment of the transcript.

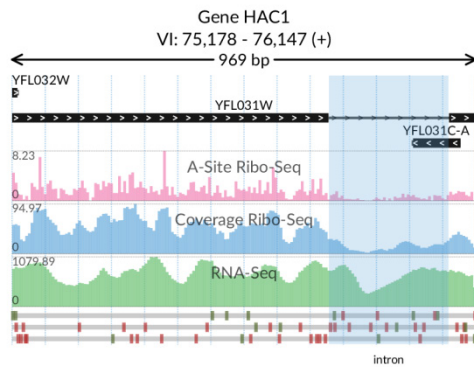

#### Command line

```
svist4get -bg svist4get_data/RiboProElong_cut.bedGraph svist4get_data/RiboCov_cut.bedGraph  
svist4get_data/mRNACov_cut.bedGraph -g YFL031W -gtf svist4get_data/S.cerevisiae.gtf -fa  
svist4get_data/S.cerevisiae.dna.fa -it 'Gene HAC1' -bl 'A-Site Ribo-Seq' 'Coverage Ribo-Seq'  
'RNA-Seq' -hf 75839 76091 'intron' -c A4_p1
```

### An arbitrary genomic window

Here we used svist4get to visualize an arbitrary genomic window on the chromosome I.

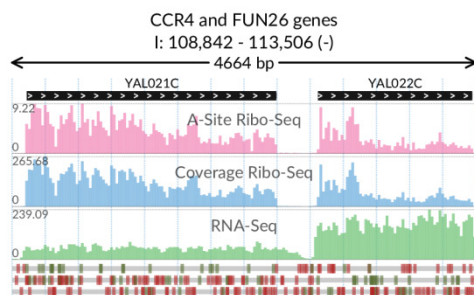

#### Command line

```
svist4get -bg svist4get_data/RiboProElong_cut.bedGraph svist4get_data/RiboCov_cut.bedGraph  
svist4get_data/mRNACov_cut.bedGraph -gtf svist4get_data/S.cerevisiae.gtf -fa  
svist4get_data/S.cerevisiae.dna.fa -bl 'A-Site Ribo-Seq' 'Coverage Ribo-Seq' 'RNA-Seq' -w I  
108842 113506 -it 'CCR4 and FUN26 genes' -rc -c A4_p1
```

## Section 4. Advanced visualization of tissue-specific expression for overlapping transcripts in mouse (Figure 3 of the paper)

The necessary data are not included in the svist4get samples and can be downloaded from [\[https://gwips.ucc.ie/downloads/index.html\]](https://gwips.ucc.ie/downloads/index.html) (Ribo-Seq and RNA-Seq data of mouse liver and kidney, 'Liver: Janich15 ZT12' and 'Kidney: CasteloSzekely17 ZT12'), [\[ftp://ftp.ebi.ac.uk/pub/databases/gencode/Gencode\\_mouse/release\\_M19/gencode.vM19.annotation.gtf.gz\]](ftp://ftp.ebi.ac.uk/pub/databases/gencode/Gencode_mouse/release_M19/gencode.vM19.annotation.gtf.gz) (the mouse genome annotation), [\[ftp://ftp.ebi.ac.uk/pub/databases/gencode/Gencode\\_mouse/release\\_M19/GRCm38.primary\\_assembly.genome.fa.gz\]](ftp://ftp.ebi.ac.uk/pub/databases/gencode/Gencode_mouse/release_M19/GRCm38.primary_assembly.genome.fa.gz) (the mouse genome assembly).

The bigWig (\*.bw) files should be then converted to bedGraph format by custom scripts or UCSC utilities.

### Possible command line

```
svist4get -bg Kidney_Footprints.bedGraph Kidney_RNA_Seq.bedGraph Liver_Footprints.bedGraph  
Liver_RNA_Seq.bedGraph -gtf data_sv4g/Mouse.gtf -fa data_sv4g/Mouse.fa -g ENSMUSG0000051339.10  
-st ENSMUST00000211733.1 ENSMUST00000212276.1 -hi -rc -it 'Ribosome occupancy in overlapping  
transcripts, mouse liver and kidney data' -bl 'Ribo-Seq (Kidney)' 'RNA-Seq (Kidney)' 'Ribo-Seq  
(Liver)' 'RNA-Seq (Liver)' -c A4_p2 -hrf 0
```

## Section 5. Advanced features and customization (Figure 4 of the paper)

Figure 4 can be reproduced by running the following commands in the console (assuming the package installation and the post-installation preparatory step are finished).

### Command line

```
svist4get -gtf svist4get_data/MATa.gtf -fa svist4get_data/MATa.fasta -pbg  
svist4get_data/mata_ribo1_plus.bedGraph svist4get_data/mata_ribo1_minus.bedGraph -pbg  
svist4get_data/mata_ribo2_plus.bedGraph svist4get_data/mata_ribo2_minus.bedGraph -pbg  
svist4get_data/mata_rna1_plus.bedGraph svist4get_data/mata_rna1_minus.bedGraph -pbg  
svist4get_data/mata_rna2_plus.bedGraph svist4get_data/mata_rna2_minus.bedGraph -w V01313.1 390  
2430 -rc -it 'MAT locus of MATa yeast strain' -bl 'Ribo-Seq (sample1)' 'Ribo-Seq(sample2)' 'RNA-  
Seq (sample1)' 'RNA-Seq (sample2)' -bgc brightorange brightorange purple purple -c  
svist4get_data/alt_A4_p1.cfg -hf 1224 1305 ' ' -hf 1533 1638 'Translated open reading frames' -hf  
1692 1932 ' '
```

## Useful customization options

Figure 4 of the manuscript used several advanced features: paired bedGraph tracks (`-pbg`), multiple highlighting (several `-hf`), and custom tracks colors (`-bgc`). Additional colors are supported through alternative `palette.txt` file which is referenced in the alternative configuration file `alt_A4_p1.cfg`. Two default configuration files (`A4_p1.cfg` and `alt_A4_p2.cfg`) provide default presets for generating figures to fit one- and two-column layout of an A4 page. Custom page size can be also defined, if necessary, along other useful tweaks such as image title show/hide switch (`show_title`, default = 1) and DPI setting for png export (`png_dpi`, default = 300).

The default configuration files can be found in the `svist4get` sample data folder which is unpacked at the post-installation step (see Section 1).

Detailed description of the configuration file parameters can be found online at

<https://bitbucket.org/artegorov/svist4get/>
